# Supplementary material for: Fine Mapping of the Pond Snail Left-Right Asymmetry (Chirality) Locus Using RAD-Seq and Fibre-FISH
Source: PLoS One. 2013 Aug 12;8(8):e71067. doi: 10.1371/journal.pone.0071067 (PMC3741322; doi:10.1371/journal.pone.0071067)
Supplement: Table S1 — Summary statistics for RAD Sequencing library. Raw Illumina read pair counts, candidate alleles and loci generated by RADtools, and mean coverage per allele for each of 10 dextral and 10 sinistral snails in the sequenced RAD-Seq library. (XLSX) [file pone.0071067.s001.xlsx]

## Sheet: Table S1
Table S1 Summary statistics for RAD Sequencing library.
Raw Illumina read pair counts, candidate alleles and loci generated by RADtools, and mean coverage per allele for each of 10 dextral and 10 sinistral snails in the sequenced RAD-Seq library.
	Number of	Candidate	Candidate	Mean coverage
	reads	alleles	loci	per allele
Dextral 1	519627	25927	22595	20
Dextral 2	635381	31195	27646	20
Dextral 3	1404390	48375	41391	29
Dextral 4	361707	22180	19568	16
Dextral 5	809549	34550	29732	23
Dextral 6	862632	34820	30237	25
Dextral 7	1281051	45577	38628	28
Dextral 8	818461	27278	23274	30
Dextral 9	899848	31992	27474	28
Dextral 10	531940	24198	21245	22
Sinistral 1	760666	38375	33798	20
Sinistral 2	853811	34111	29519	25
Sinistral 3	415672	22529	19839	18
Sinistral 4	458637	24496	21425	19
Sinistral 5	2155349	60187	49757	36
Sinistral 6	359438	21103	18686	17
Sinistral 7	1445881	49085	41488	29
Sinistral 8	247133	18842	16938	13
Sinistral 9	1681871	63473	54881	26
Sinistral 10	1100581	39539	33626	28
TOTAL	17603625
MEAN	880181	34892	30087	24
SD	499617	12842	10628	6

## Sheet: Table S2
Table S2 Polymorphism in the 20 putatively linked RAD-Seq loci.
	Marker		Assembly	Overlap1	Tag2:		Total3:		Tag			SNP density4
			(bp)	(bp)	Indels	SNPs	Indels	SNPs	Blast N	Blast X		%
965-343	A	rad1	519	484	0	2	3	5				1.03306
450-159	B	rad2	559	535	0	3	2	15				2.80374
147-634	C		238	214	0	2	0	3				1.40187
1315-507	E	rad4	507	488	1	0	1	1	No hit	No hit		0.204918
521-246	F	rad5	584	568	0	4	4	10				1.76056
164-416	G		586	535	1	2	3	10				1.86916
614-1427	H	rad7	629	562	0	1	2	8	No hit	hypothetic		1.42349
336-891	I		268	252	0	1	0	1				0.396825
343-788	J		533	523	0	3	2	13				2.48566
380-740	K		262	186	0	2	0	2				1.07527
539-178	L		486	485	0	1	1	9				1.85567
615-264	M5		560	493	0	3	1	10				2.0284
640-215	N		314	308	1	1	2	5				1.62338
855-314	O		543	538	0	1	3	14				2.60223
951-377	P		551	471	0	1	1	5				1.06157
1089-3162	Q5				0	3
1294-465	R		325	321	0	1	1	7				2.18069
1347-535	S		534	533	0	2	2	27				5.06567
1725-533	T5				0	5
193-626	U5		523	441	0	3	3	13				2.94785
	Sum		8521	7937	3	41	31	158			Mean	1.81601
1 Sequence that is overlapping between dextral and sinistrally derived haplotypes
2 Number of polymorphic sites in the 90 bp tag
3 Number of polymorphic sites in wholly overlapping sequence
4 Number of polymorphic sites per 100 bp
5 Paired end sequence not easily aligned; tag only informative
